# Supplementary material for: Polar pattern formation: hydrodynamic coupling of driven filaments
Source: Royal Society of Chemistry journal article supplement (doi:10.1039/c0sm01063d), 2011-01-01
Supplement: c0sm01063d.pdf [file c0sm01063d.pdf]

## Polar Pattern Formation: Hydrodynamic coupling of driven filaments - Supplemental Material -

08.12.2010

### 1. Supplemental Figure

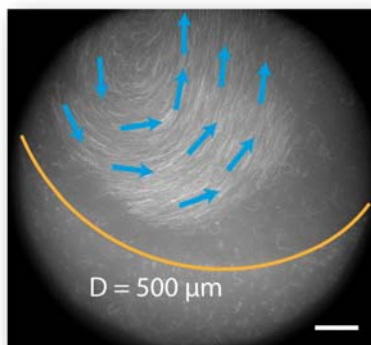

**Figure S1: Guidance of molecular motion by micro-patterned surfaces.** With circular boundaries (yellow line) persistent swirling motions can be induced as exemplified with a time overlay of 10 consecutive images. The blue arrows mark the margin of the active region and the scale bar is  $50 \mu\text{m}$  and the density is set to  $\rho = 18 \mu\text{m}^{-2}$ .

### 2. Video Captions

**Video1:** Emergence of ordered structures in the high density motility assay. The filament density is set to  $\rho = 21 \mu\text{m}^{-2}$ , labeling ratio 1:200, 100x objective).

**Video2:** Cluster of coherently moving filaments subjected to fluid flow. ( $\rho = 8 \mu\text{m}^{-2}$ , labeling ratio 1:200, 40x objective).

**Video3:** Scattering events of colliding clusters. ( $\rho = 14 \mu\text{m}^{-2}$ , labeling ratio 1:200, 40x objective).

**Video4:** Coherently moving cluster of filaments confined to a circular active region with a diameter  $D = 600 \mu\text{m}$  ( $\rho = 16 \mu\text{m}^{-2}$ , labeling ratio 1:320, 40x objective).

**Video5:** Cluster wall interactions for an intersection angle close to  $90^\circ$  ( $D = 600\mu\text{m}$ ,  $\rho = 20 \mu\text{m}^{-2}$ , labeling ratio 1:320, 40x objective).
